# Supplementary material for: Confirming Stereochemical Structures of Strigolactones Produced by Rice and Tobacco
Source: PubMed Central journal article supplement — Mol Plant. 2012 Nov 30;6(1):153–63. doi: 10.1093/mp/sss139 (PMC3548624; doi:10.1093/mp/sss139), 2012-11-30
Supplement: supp_sss139_mplant013656_file001.pdf [file supp_sss139_mplant013656_file001.pdf]

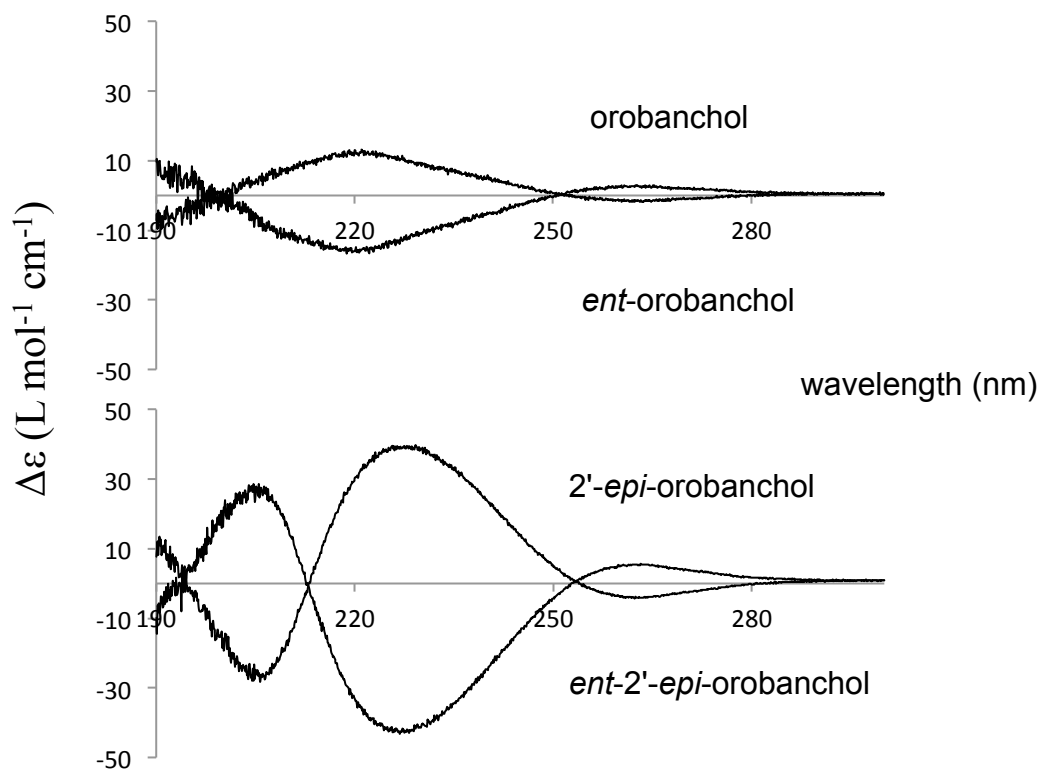

Supplementary Figure 1. CD spectra of synthetic standards of orobanchol, *ent*-orobanchol, *2'*-*epi*-orobanchol and *ent-2'*-*epi*-orobanchol

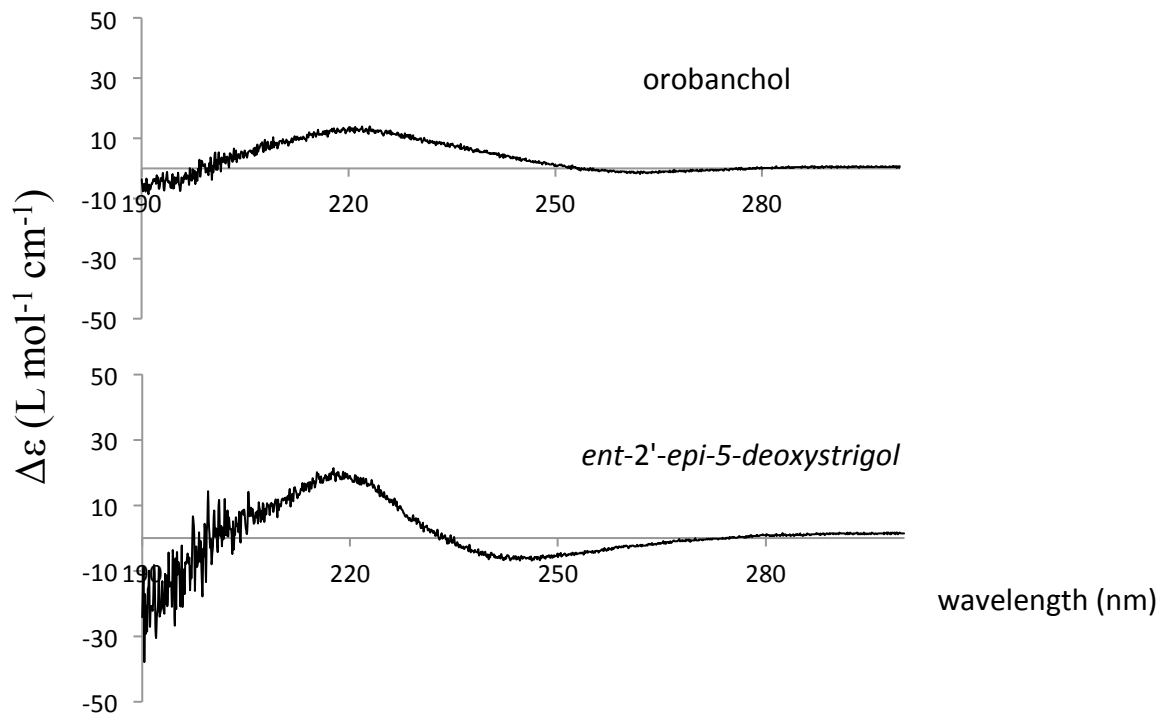

Supplementary Figure 2. CD spectra of orobanchol and *ent-2'-epi-5-deoxystrigol* purified from rice root exudate

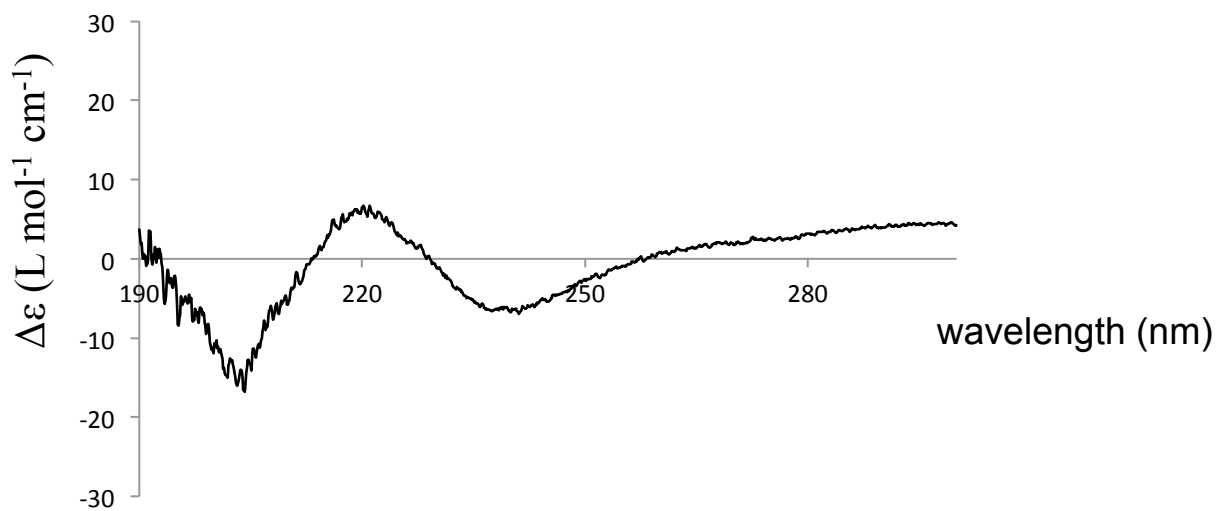

Supplementary Figure 3. CD spectrum of solanacyl acetate purified from tobacco root exudate

(A)

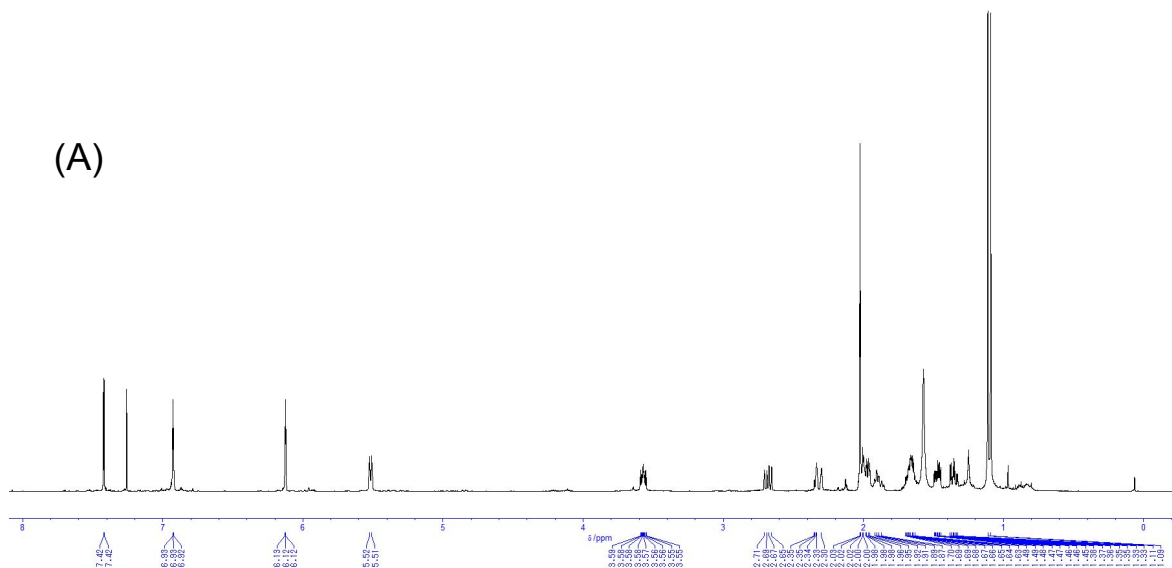

(B)

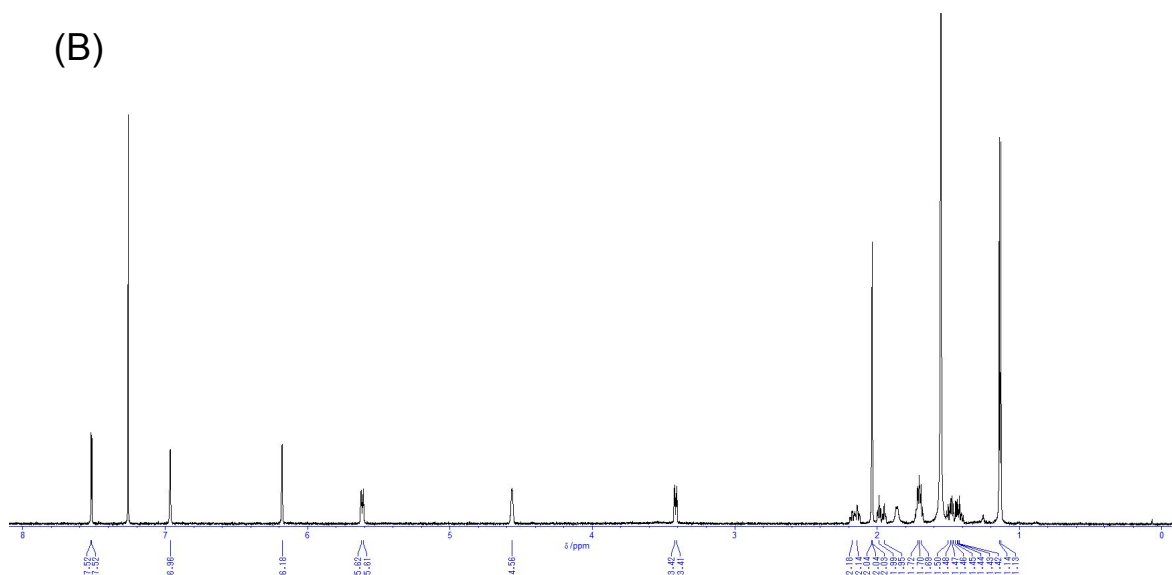

Supplementary Figure 4. <sup>1</sup>H NMR spectra of *ent*-2'-*epi*-5-deoxystrigol (A) and orobanchol (B)

(A)

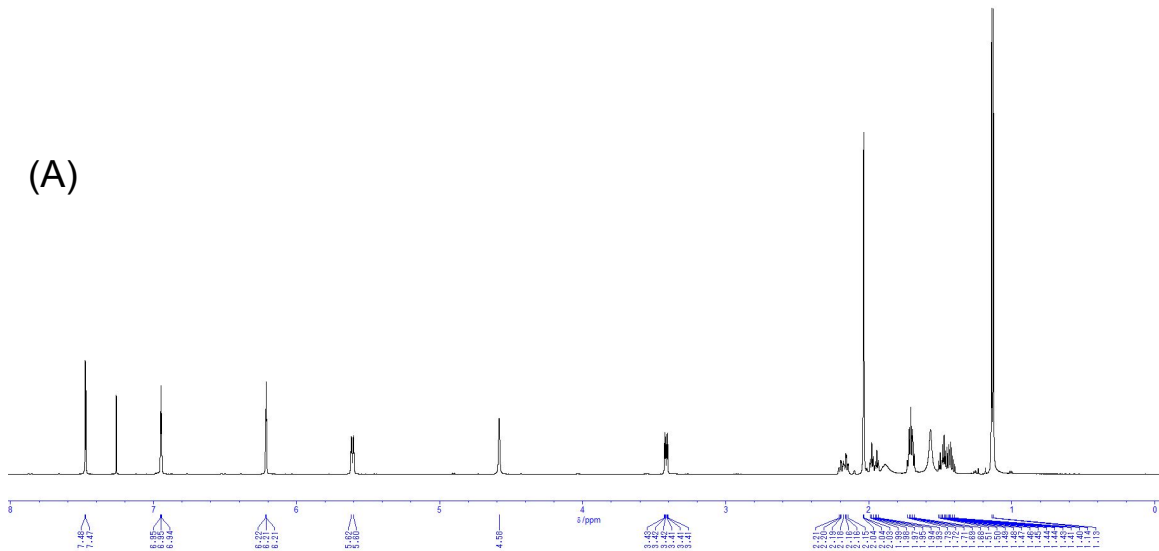

(B)

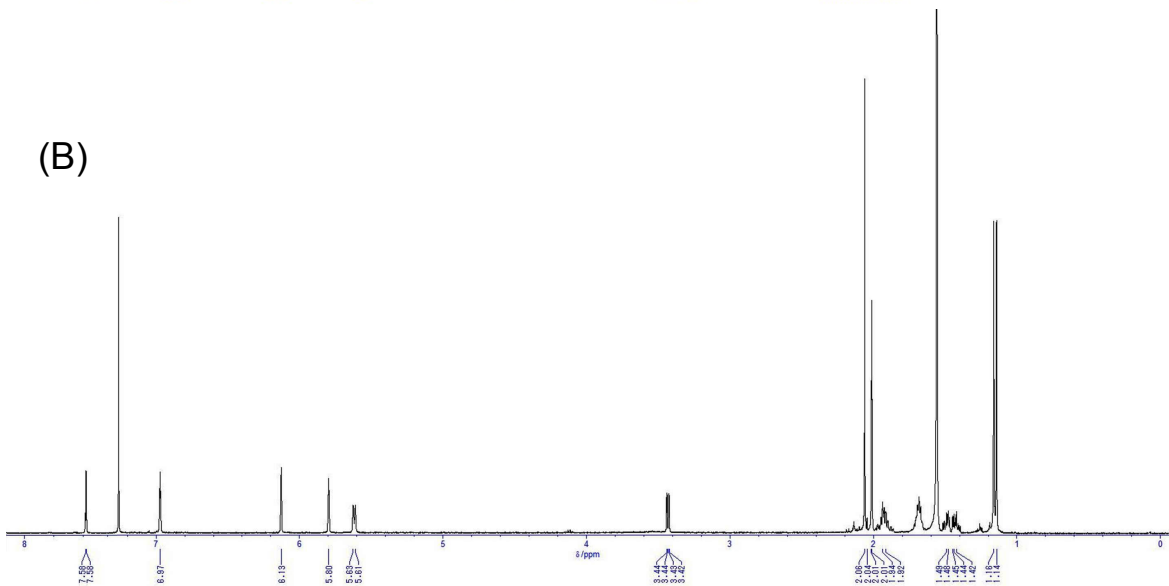

(C)

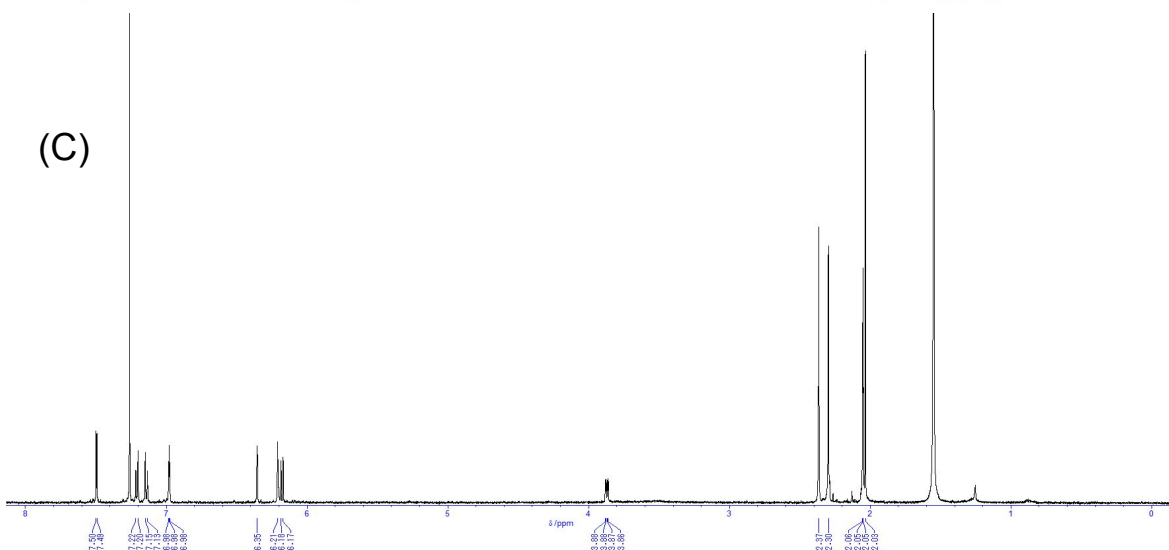

Supplementary Figure 5. <sup>1</sup>H NMR spectra of *ent*-2'-*epi*-orobanchol (A), *ent*-2'-*epi*-orobanchyl acetate (B) and solancyl acetate (C)
